# Supplementary material
Source: PubMed Central journal article supplement (PMC3672312)
Supplement: NIHMS439596-supplement-supplement_1.pdf [file NIHMS439596-supplement-supplement_1.pdf]

## SUPPLEMENTAL TABLE 1

## Quantification of primordial and early-growing follicles in each treatment group 48 hours after CTx (or vehicle) treatment.

| Treatment       | Primordial follicles (mean $\pm$ SEM) | Early-growing follicles (mean $\pm$ SEM) |
|-----------------|---------------------------------------|------------------------------------------|
| Vehicle         | 1,546 $\pm$ 456                       | 611 $\pm$ 147                            |
| CTx             | 1,048 $\pm$ 234                       | 585 $\pm$ 86                             |
| CTx + G-CSF/SCF | 1,165 $\pm$ 254                       | 436 $\pm$ 87                             |
| CTx + G-CSF     | 1,005 $\pm$ 196                       | 492 $\pm$ 31                             |

Note: n = 3 mice per group. Counts were conducted on every fifth section and multiplied by five to estimate the number of follicles per ovary. Values are the average number of follicles per ovary. No differences were observed among treatment groups ( $P > .05$ ). CTx = cyclophosphamide/busulfan; CTx + G-CSF = cyclophosphamide/busulfan + granulocyte colony-stimulating factor; CTx + G-CSF/SCF = cyclophosphamide/busulfan + granulocyte colony-stimulating factor/stem cell factor.

Skaznik-Wikiel. G-CSF reduces follicle loss after chemotherapy. *Fertil Steril* 2013.

## SUPPLEMENTAL TABLE 2

**Lhx8-positive primordial follicles in each treatment group 21 days after CTx (or vehicle) treatment.**

| Treatment       | Primordial follicles/section (mean $\pm$ SEM) |
|-----------------|-----------------------------------------------|
| Vehicle         | 3.10 $\pm$ 0.37 <sup>a</sup>                  |
| CTx             | 0.07 $\pm$ 0.05 <sup>b</sup>                  |
| CTx + G-CSF/SCF | 0.53 $\pm$ 0.14 <sup>c</sup>                  |
| CTx + G-CSF     | 0.33 $\pm$ 0.09 <sup>c</sup>                  |

Note: n = 3 mice per treatment group. Counts were conducted on 10 nonconsecutive sections from the middle of one ovary from each animal and reported as the average number of follicles per section. Values are the average number of primordial follicles per section. Values with different superscript letters are statistically different ( $P < .05$ ). CTx = cyclophosphamide/busulfan; CTx + G-CSF = cyclophosphamide/busulfan + granulocyte colony-stimulating factor; CTx + G-CSF/SCF = cyclophosphamide/busulfan + granulocyte colony-stimulating factor/stem cell factor.

Skaznik-Wikiel. G-CSF reduces follicle loss after chemotherapy. *Fertil Steril* 2013.

## SUPPLEMENTAL TABLE 3

Average pup weight after the first breeding of female mice from each treatment group.

| Treatment       | n  | Average weight (g) mean $\pm$ SEM |
|-----------------|----|-----------------------------------|
| Vehicle         | 37 | 1.21 $\pm$ 0.07                   |
| CTx             | 31 | 1.30 $\pm$ 0.11                   |
| CTx + G-CSF/SCF | 36 | 1.26 $\pm$ 0.09                   |
| CTx + G-CSF     | 27 | 1.23 $\pm$ 0.13                   |

Note: Values are the average weight per pup in each treatment group. No differences were observed among treatment groups ( $P > .05$ ). CTx = cyclophosphamide/busulfan; CTx + G-CSF = cyclophosphamide/busulfan + granulocyte colony-stimulating factor; CTx + G-CSF/SCF = cyclophosphamide/busulfan + granulocyte colony-stimulating factor/stem cell factor.

Skaznik-Wikiel. G-CSF reduces follicle loss after chemotherapy. *Fertil Steril* 2013.
